# Supplementary material
Source: PubMed Central journal article supplement (PMC11017884)
Supplement: NIHPP2024.03.25.586570v2-supplement-2.pdf [file NIHPP2024.03.25.586570v2-supplement-2.pdf]

## Supplementary Material

Supplemental Table 1 | qPCR primer list.

| Housekeeping gene | Forward primer sequence (5'-3') | Reverse primer sequence (5'-3') |
|-------------------|---------------------------------|---------------------------------|
| <i>Gapdh</i>      | TGGATCTGACGTGCCGC               | TGCCTGCTCACCACCTTC              |

| Negative control gene | Forward primer sequence (5'-3') | Reverse primer sequence (5'-3') |
|-----------------------|---------------------------------|---------------------------------|
| <i>Gfp</i>            | GAAGCGCGATCACATGGT              | CCATGCCGAGAGTGATCC              |

| GPCR-encoding genes | Forward primer sequence (5'-3') | Reverse primer sequence (5'-3') |
|---------------------|---------------------------------|---------------------------------|
| <i>Adcyap1r1</i>    | TATGGACTTCAAGCACCGGC            | TCTTGCTCAGGATGGACAGC            |
| <i>Adora2a</i>      | GTTAGGTAGGCAGAGGGACAGG          | CTGCGATTGCTTCCCTTCTCTG          |
| <i>Adora2b</i>      | GGAACCGAGACTTCCGCTAC            | GACTGAGAGTAGACTGCGCC            |
| <i>Adrb1</i>        | CTACAACGACCCCAAGTGCT            | ACGTAGAAGGAGACGACGGA            |
| <i>Adrb2</i>        | TACACAGGGGAGCCAAACAC            | TCAACGCTAAGGCTAGGCAC            |
| <i>Adrb3</i>        | CAGGCTCTGTGTCTCTGGTTA           | GAGGAGACAGGGATGAAACCTC          |
| <i>Agtr1a</i>       | CTTAGGGTTGGAACCTGCGG            | TCATCCAGTCCCTCCCAACT            |
| <i>Bdkrb1</i>       | CCGCTACAGGTTGCTGGTAT            | TTGACGGAACGCAGAAGGAA            |
| <i>Cckar</i>        | ACTGCCAAGTCCACGTTCAA            | TCATCTGGGGCGTTCCAAAA            |
| <i>Chrm2</i>        | ACTGCCATTGCGGCTTTCTA            | TATTCTGCTCTTGCTCGCCC            |
| <i>Chrm4</i>        | GCCTCTGGCTAGTTCCGCC             | TCGCCATGCTGAACCCAAC             |
| <i>Drd2</i>         | GACACCACTCAAGGGCAACT            | ATCCATTCTCCGCCTGTTCA            |

|               |                       |                           |
|---------------|-----------------------|---------------------------|
| <i>Drd5</i>   | CGAACCTACGCCATCTCCTC  | GCGCGTGTAGGTCACTATCA      |
| <i>Gabbr2</i> | ACAGGCGATTCCAGTTCACA  | CGTAGGCGGTGGTTTTCTGA      |
| <i>Gpr3</i>   | ATCTACGCCTTTTCGCAACCA | CGGGACCGGAATGGAATCTT      |
| <i>Gpr65</i>  | CATGGGCTACGCAATACCCT  | TGTTTTCCGTGGCTTGGTTG      |
| <i>Gpr68</i>  | ACGATACCAGCCCAAGTGTG  | CACCTTAACCAGTCCTCTGGC     |
| <i>Grm4</i>   | TACCAGTACCAACGTGCGAA  | GCATCCGCTCTATTCTGAGGT     |
| <i>Grm8</i>   | TGTGCTCCTAACGGGGATTT  | GATGATTGTGTCAGGTGCCG      |
| <i>Hcar1</i>  | AGTGTGAAGGAAACCGTGGG  | CGCTTTTCTCAGCCATGCAA      |
| <i>Hcar2</i>  | GCGGCCATCATTCTTGCTT   | GCCTCGCCATTTTTGGTCAT      |
| <i>Hrh3</i>   | TTAGAGCATCAACCCGGCAG  | CACTCCAGTTCACCAACGA       |
| <i>Htr7</i>   | GTGGTCAAAATGGGAAACGGA | CCATTCTGCCTCACGGGGTA      |
| <i>Lpar2</i>  | GGCAGATGACTTGACTTCGC  | GCCTCCCTGAATGTTTGCTC      |
| <i>Oprd1</i>  | TGGATGCTTTTGGGGTTCCT  | AAACAAAGGGTCTCGGTGCT      |
| <i>Oprl1</i>  | TCCTCAGGCACACCAAGATG  | GAAGGGCAGTGTGAGCAAGA      |
| <i>P2ry12</i> | AACGCCAGTGTCAATTGCTG  | TCTCCTTTTATTCTTGCACTGTGAC |
| <i>Pthr1</i>  | AGCGAGTGCCTCAAGTTCAT  | TCCCACGGTGTAGATCATGC      |
| <i>S1pr5</i>  | AACTCGCTGCTGAATCCCAT  | GGAGGAGTCTTGTTGCAGG       |
| <i>Tacr1</i>  | AGGTGTCTGGGGTTTCTTTA  | CCTAGAAGTGACAGGTGACCA     |

| Immediate-early genes | Forward primer sequence (5'-3') | Reverse primer sequence (5'-3') |
|-----------------------|---------------------------------|---------------------------------|
|-----------------------|---------------------------------|---------------------------------|

|              |                               |                         |
|--------------|-------------------------------|-------------------------|
| <i>ΔFosB</i> | AGGCAGAGCTGGAGTCGGAGAT        | GCCGAGGACTTGAACCTCACTCG |
| <i>Arc</i>   | GCACAAAAGCCATGACCCAT          | TCTCCCTAGTCCCCAGGGC     |
| <i>c-Fos</i> | CCTGCCCCTTCTCAACGAC           | GCTCCACGTTGCTGATGCT     |
| <i>Egr1</i>  | GCCGAGCGAACAACCCTAT           | TCCACCATCGCCTTCTCATT    |
| <i>Egr2</i>  | GTTGACTGTCACTCCAAGAAATGG      | AGCGCAGCCCTGTAGGC       |
| <i>NPas4</i> | GCTATACTCAGAAGGTCCAGAAGG<br>C | TCAGAGAATGAGGGTAGCACAGC |

| <b>Ion channel-encoding genes</b> | <b>Forward primer sequence (5'-3')</b> | <b>Reverse primer sequence (5'-3')</b> |
|-----------------------------------|----------------------------------------|----------------------------------------|
| <i>Cacna1d</i> (isof.1)           | GCTCGGTGGCTGTATTTTCAA                  | CCGTGCTTTCTACCGCACTT                   |
| <i>Cacna2d3</i>                   | GCAGATCGCAGGAAGCTTTG                   | ACGGGAGATTTCCGCTCATC                   |
| <i>Hcn1</i>                       | CGTGAAGCATGACCGAGAGA                   | GTAGACTGGCGGAGATTGGG                   |
| <i>Hcn2</i>                       | CATCCACACCAAAGCCATGC                   | CCCGCCTCCTAAGCTACCTA                   |
| <i>Kcna1</i>                      | TGCTGTGTGTCGCTCAATCT                   | TCTCCGAACTGGACACTTGC                   |
| <i>Kcna2</i>                      | TACCCATCTGCAAGGGCAACG                  | CGACTTGAGGAGGAGAGTGGA                  |
| <i>Kcnab1</i>                     | TCTTGGACTGGTCCCCTACC                   | AGATTCCCCTACCCCAGCAT                   |
| <i>Kcnb1</i>                      | GAGAGGGCGTGGCTAAGAAG                   | GCCCTCTTGGTCCATTTCCA                   |
| <i>Kcnj14</i>                     | GCCGAGGACAGACCTGAACAC                  | ACTGGGGGTTCTCTGCTCA                    |
| <i>Kcnn3</i>                      | ATCCACCGTCATCCTGCTTG                   | GTAGGTCATGGCTATCCGCC                   |
| <i>Kcnn2</i>                      | ACAAGGCGTCGCTGTATTCT                   | CTGTATTTCCCTGGCGTGGT                   |

|                |                          |                         |
|----------------|--------------------------|-------------------------|
| <i>Kcnq2</i>   | GCCATTTTGTACGTGCCCTT     | TAGAAGACAGCGTCGTGTGC    |
| <i>Kcnq3</i>   | AGTCTTGCTTCCCTGGTGATTC   | TCGTCCTGCATTTGGCTGATA   |
| <i>Kcnq5</i>   | GCAGCCACCAGACTAAAGGA     | CTGCCGCTTCCAATTCCAAA    |
| <i>Kcnt2</i>   | CTGTGCACTTAAAAGCAATACAGT | AGCATTTTCCACATCCATGACT  |
| <i>Scn1a</i>   | TACAGAAGCAGACCGTAGGC     | TGTGATTAGCATCATTTTGGGCT |
| <i>Scn8a</i>   | CCTTCTTACGAGACCCGTGG     | ACCCTGAAAGTGCGTAGAGC    |
| <i>Tmem16f</i> | TGGAACCCTGATCTTCGCTG     | TTGCTGTAGCTCAACGGTGT    |
| <i>Trpm5</i>   | GAATGGGGACTACAGAGGCTG    | CGAATGTTTCCTGTGGAGGC    |

## Supplementary Figure

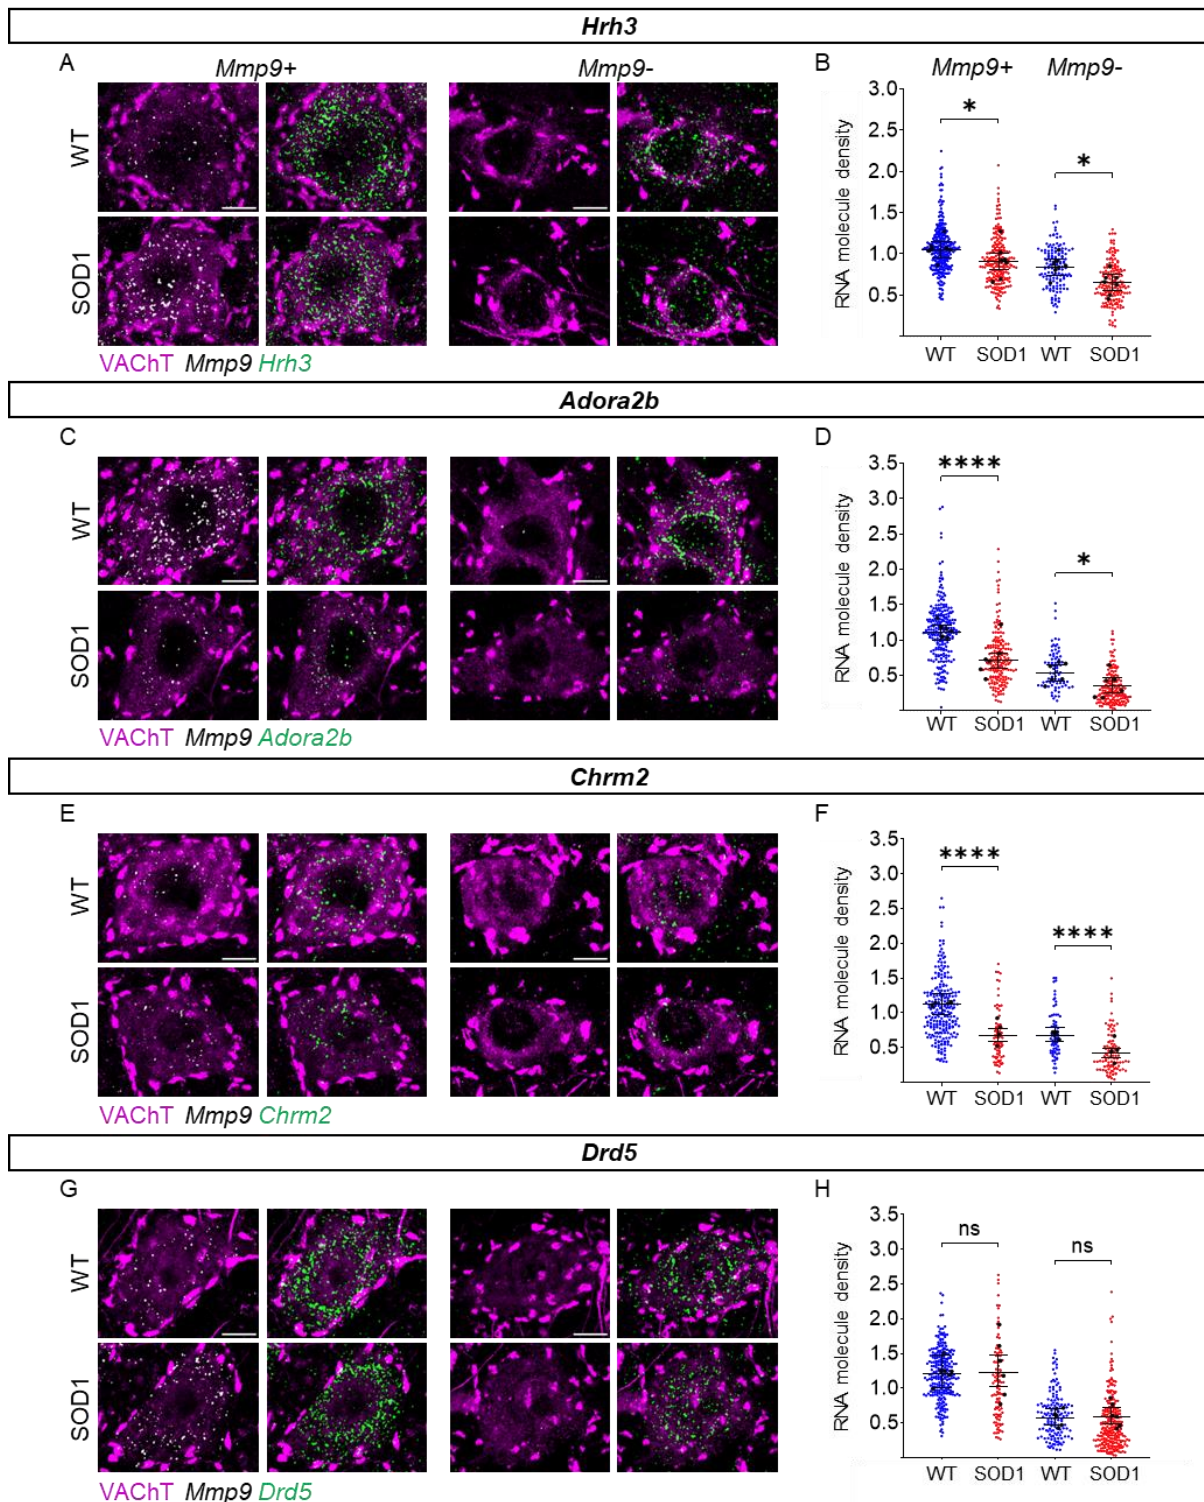

**Supplemental Figure 1 | Additional disease-driven transcriptional changes in pre-symptomatic SOD1 MNs at single-molecule single-MN resolution.** **A, C, E, G**) Representative confocal images of individual p45 WT and SOD1 *Mmp9+* and *Mmp9-* MNs for *Hrh3*, *Adora2b*, *Chrm2* and *Drd5* ISH, respectively. MNs are identified by VACHT+ C-boutons and diffuse cytoplasmic signal (magenta); cytoplasmic spots define single mRNA molecules of *Mmp9* (white) or the GPCRs of interest (green). Scale bar=10 $\mu$ m. **B, D, F, H**) Quantification of the density of single mRNA molecules of *Hrh3* (**B**), *Adora2b* (**D**), *Chrm2* (**G**) and *Drd5* (**H**) per MN cross-section area. In each dot plot, small dots correspond to individual MN, whereas large dots indicate individual mouse means; the error bar delineates the overall mean and corresponding 95% confidence interval (for *Chrm2* and *Drd5* it is back-propagated from the log scale). N = 4-6 mice per genotype group. \* $p$ <0.05, \*\* $p$ <0.01, \*\*\* $p$ <0.001, \*\*\*\* $p$ <0.0001, ns - non significant.

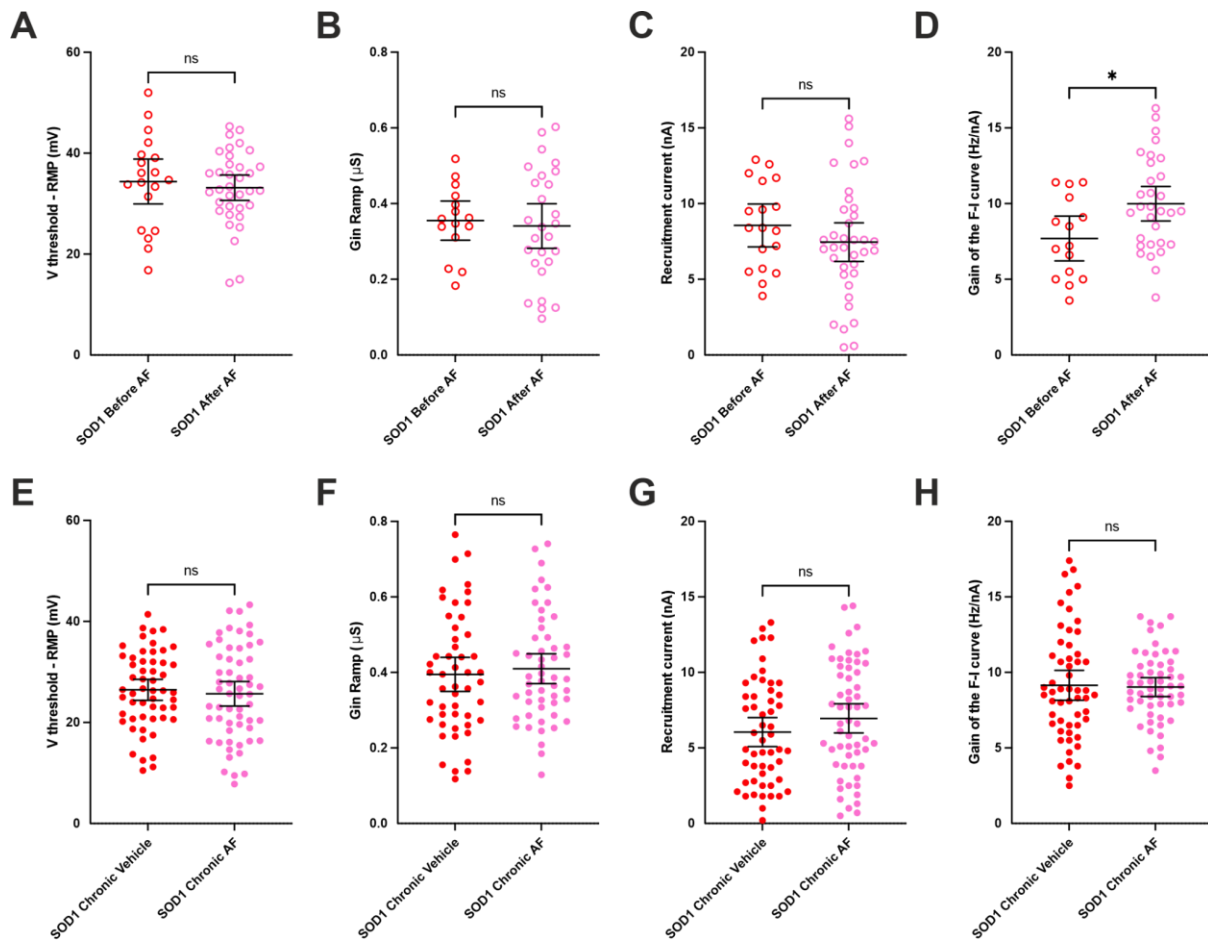

**Supplemental Figure 2 | Replication of acute and prolonged delivery of adrenergic  $\beta$ 2/ $\beta$ 3 agonists on a different cohort. A-H) Electrophysiological properties were obtained from slow ramps of current, as in Figure 3 and 7 but were performed in Poznan. A-D) Effect of the acute treatment on Voltage threshold - resting membrane potential (A), ramp input conductance (B), recruitment current (C), gain of the F-I relationship (D), in MNs from SOD1 mice. E-H) Effect of the chronic treatment on Voltage threshold - resting membrane potential (E), ramp input conductance (F), recruitment current (G), gain of the F-I relationship (H), in MNs from SOD1 mice. In all graphs, each point represents one MN and the mean  $\pm$  95% CI are shown. Significances on top bars are for treatment effects. N = 7 Acute SOD1 mice and N = 11 Chronic SOD1 mice. \* $p < 0.05$ , \*\* $p < 0.01$ , \*\*\* $p < 0.001$ , \*\*\*\* $p < 0.0001$ , ns - non significant.**
